# Supplementary material for: Near-infrared electrochromic and chiroptical switching polymers: synthesis and characterization of helical poly(N-propargylamides) carrying anthraquinone imide moieties in side chains
Source: Royal Society of Chemistry journal article supplement (doi:10.1039/b927360c), 2010-01-01
Supplement: b927360c.pdf [file b927360c.pdf]

# Near-Infrared Electrochromic and Chiroptical Switching Polymers: Synthesis and Characterization of Helical Poly(N-propargylamides) Carrying Anthraquinone Imides Moieties in Side Chains

Yijun Zheng, Jiayi Cui, Jia Zheng and Xinhua Wan<sup>a</sup>

<sup>5</sup> Received (in XXX, XXX) Xth XXXXXXXXXX 200X, Accepted Xth XXXXXXXXXX 200X

First published on the web Xth XXXXXXXXXX 200X

DOI: 10.1039/b000000x

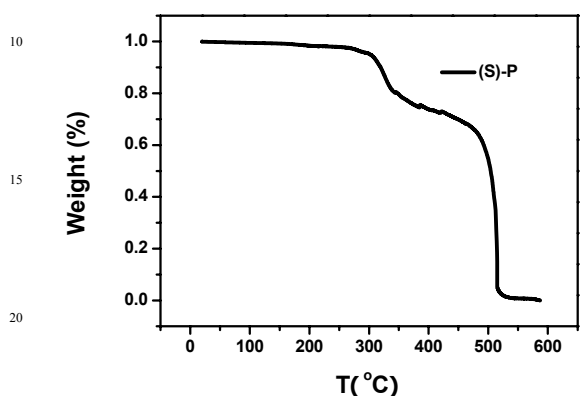

<sup>25</sup> Figure S1. TGA curve of the polymer *S*-(-)-P with a heating rate of 10 °C/min.

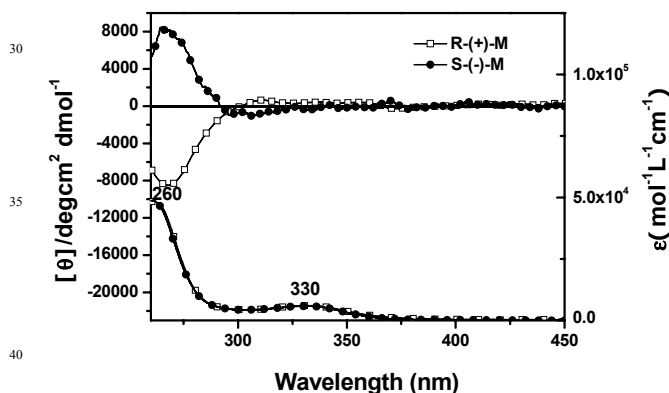

Figure S2. CD and UV-vis spectra of the monomers measured in NMP at room temperature ( $c = 1 \times 10^{-3}$  M).

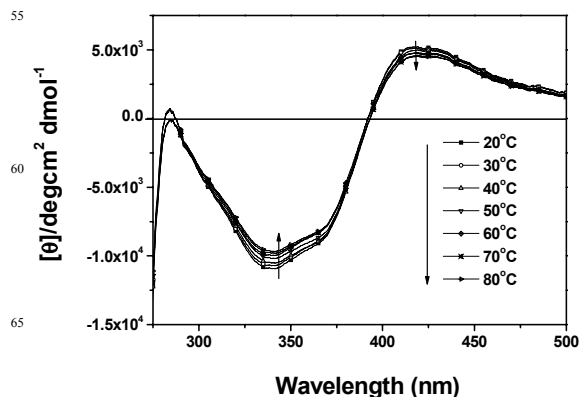

Figure S3. Temperature-dependent CD spectra of *R*-(+)-P in NMP at a concentration of  $1 \times 10^{-5}$  M

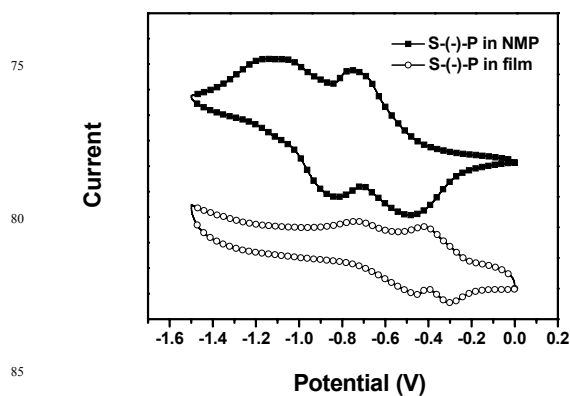

Figure S4. Cyclic voltammograms of *S*-(-)-P in film. CH<sub>3</sub>CN containing TBAP (0.1 M) at room temperature, scan rate of 100 mV/s, Pt disk working electrode, potentials vs Ag/AgCl.

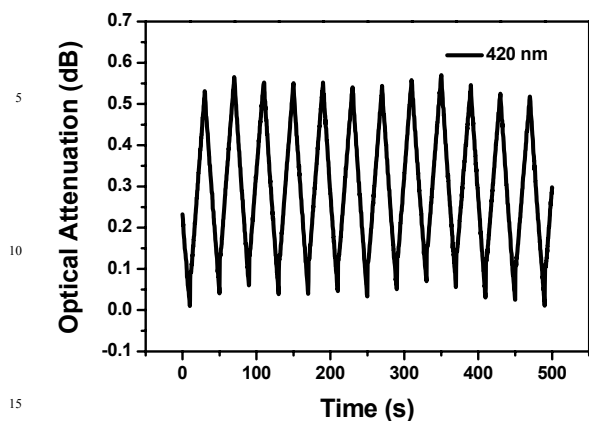

Figure S5. Optical attenuation of film of *S*(-)-*P* at 420 nm with stepping potentials between -0.7 and +0.4 V and a switching time of 20 seconds

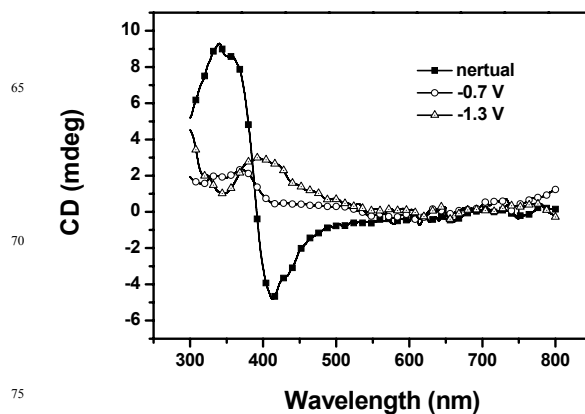

Figure S7. CD spectra of *S*(-)-*P* ( $5 \times 10^{-3}$  M containing 0.1 M TBAP) in solution at 0.0, -0.7V, and -1.3 V.

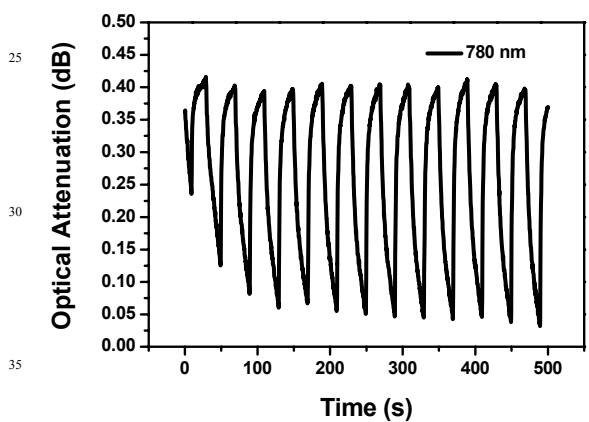

Figure S6. Optical attenuation of film of *S*(-)-*P* at 780 nm with stepping potentials between -0.7 and +0.4 V and a switching time of 20 seconds

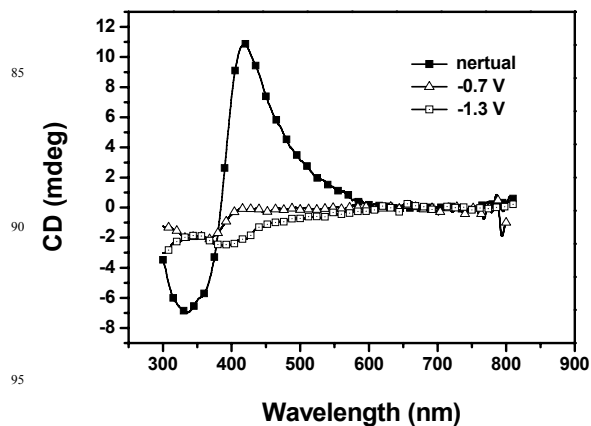

Figure S8. CD spectra of *R*(+)-*P* ( $5 \times 10^{-3}$  M containing 0.1 M TBAP) in solution at 0.0, -0.7V, and -1.3 V.
